# Supplementary material for: Intercalation of Re(phen)(CO)3Cl into zirconium phosphate: a water insoluble inorganic complex immobilized in a highly polar rigid matrix
Source: Royal Society of Chemistry journal article supplement (doi:10.1039/b618802h), 2007-01-01
Supplement: b618802h.pdf [file b618802h.pdf]

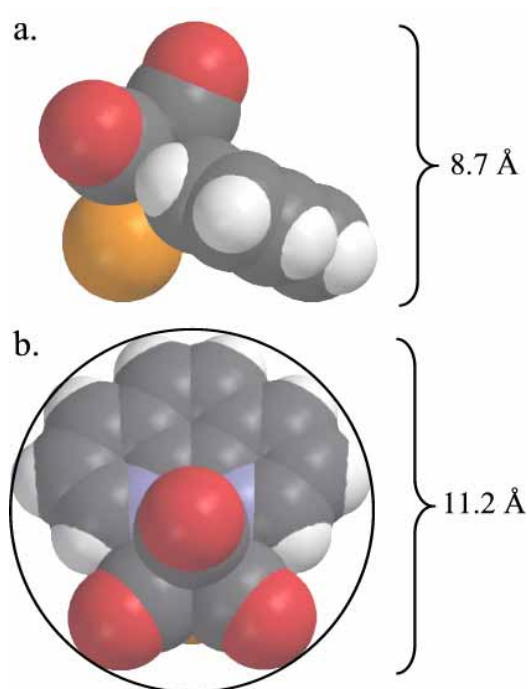

**Figure 1.** Space filling model for Re(phen)(CO)<sub>3</sub>Cl presenting: a. the minimum distance in which the complex can be oriented; b. top view of the molecule presenting its circular projection in the ab plane.

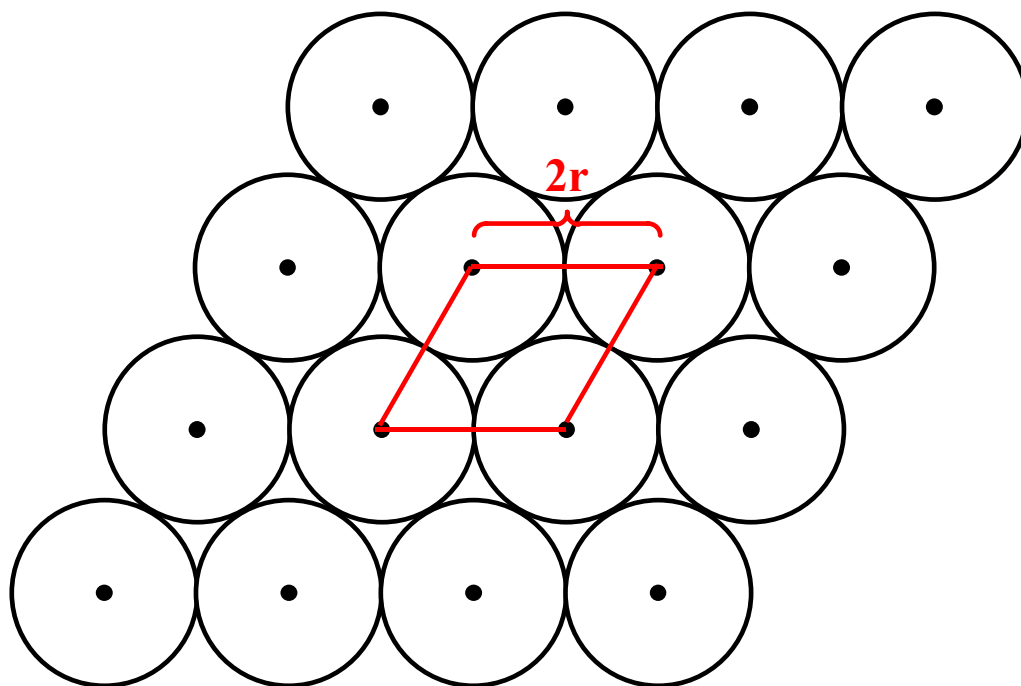

**Scheme 1.** Ideal two dimensional arrangement of  $\text{Re}(\text{phen})(\text{CO})_3\text{Cl}$  complexes in van der Waals contact.

1. The area of the parallelogram denoted by the red segments is  $P = (2r) \times (r\sqrt{3}) = 2r^2\sqrt{3}$ .
2. The area of the circle that represent the cross sectional area of  $\text{Re}(\text{phen})(\text{CO})_3\text{Cl}$  in the ZrP plane is  $\text{Re}(\text{phen})(\text{CO})_3\text{Cl} = \pi r^2$
3. The percent of area occupied by  $\text{Re}(\text{phen})(\text{CO})_3\text{Cl}$  in the parallelogram:  
$$\text{Re}(\text{phen})(\text{CO})_3\text{Cl} \% = \frac{\pi r^2}{2r^2\sqrt{3}} \times 100 = 90.7\%$$
4. Being  $r = 5.6 \text{ \AA}$  and the cross sectional area of a ZrP formula unit =  $24 \text{ \AA}^2$ , then the amount of  $\text{Re}(\text{phen})(\text{CO})_3\text{Cl}$  per ZrP is **0.221**.
